# Supplementary material
Source: PubMed Central journal article supplement (PMC2584818)
Supplement: 00061.2008_1.pdf [file 00061.2008_1.pdf]

GM-CSF on HFD

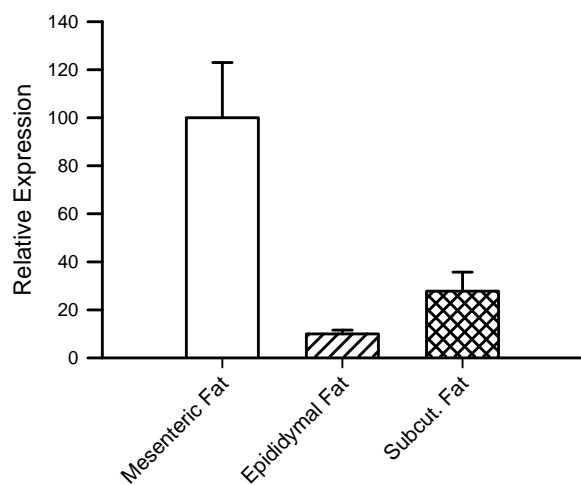

Supplementary figure 1

Supplementary figure 1. Comparison of GM-CSF mRNA expression in mesenteric, epididymal, and subcutaneous fat of wild-type mice on a high-fat diet (n = 6).
